1 **Prevalence and Factors Associated with Illicit Drug and High-Risk Alcohol Use**  
2 **among Adolescents Living in Urban Slums of Kampala, Uganda.**

3  
4 Hellen Kalungi<sup>1\*</sup>, Onesmus Kamacooko<sup>1</sup>, Jane Frances Lunkuse<sup>1</sup>, Joy Namutebi<sup>1</sup>, Rose  
5 Naluwooza<sup>1</sup>, Matt A. Price<sup>3,4</sup>, Eugene Ruzagira<sup>1,2</sup>, Yunia Mayanja<sup>1,2</sup>

6 <sup>1</sup> Medical Research Council/ Uganda Virus Research Institute and London School of  
7 Hygiene and Tropical Medicine (MRC/UVRI & LSHTM) Uganda Research Unit, P.O. Box  
8 49, Plot 51-59 Nakiwogo Road, Entebbe 256, Uganda

9 <sup>2</sup>London School of Hygiene and Tropical Medicine, Keppel Street, London WC1E 7HT,  
10 United Kingdom

11 <sup>3</sup>IAVI, 125 Broad St, New York, NY 10004 USA

12 <sup>4</sup>Department of Epidemiology and Biostatistics, University of California San Francisco,  
13 550 16<sup>th</sup> Street, CA 94143 San Francisco, USA

14

15 **\*Author for correspondence:**

16 Hellen Kalungi,

17 Medical Research Council/ Uganda Virus Research Institute and London School of  
18 Hygiene and Tropical Medicine (MRC/UVRI and LSHTM) Uganda Research Unit

19 P.O. Box 49, Plot 51-59 Nakiwogo Road, Entebbe 256, Uganda.

20 +256 417704000

21 [Hellen.Kalungi@mrcuganda.org](mailto:Hellen.Kalungi@mrcuganda.org)

22

23 **Abstract**

24 **Background;** Illicit drug and high risk alcohol use among adolescents leads to poor  
25 health outcomes. We enrolled adolescents from urban slums in Kampala, Uganda, to  
26 assess baseline prevalence, and factors associated with illicit drug and high-risk alcohol  
27 consumption.

28 **Methods;** We conducted a cross-sectional study using data collected in a cohort that  
29 enrolled 14-19-year-old male and female participants from 25-March-2019 to 30-March  
30 2020. Data was collected on social-demographics, sexual behavior and reproductive  
31 health using interviewer administered questionnaires. The main outcomes were illicit drug  
32 use and high-risk alcohol use. Data on alcohol use was collected using the Alcohol Use  
33 Disorder Identification Test (AUDIT); results were dichotomized. Factors associated with  
34 each outcome were analyzed using multivariable logistic regression.

35 **Results;** We enrolled 490 participants (60.6% female) with median age 18 (IQR 17-18)  
36 years, 91.0% had less than secondary education, 48.4% had their sexual debut before  
37 15years, 47.1% reported paid sex in the past 3 months and 24.7% had a sexually  
38 transmitted infection (chlamydia, gonorrhoea and/ or active syphilis) at enrolment.

39 The prevalence of illicit drug use was 34.9% while 16.1% were screened as high-risk  
40 alcohol users. Illicit drug use was associated with being male (aOR 9.62; 95% CI 5.74-  
41 16.11), being married (aOR 2.24; 95%CI 1.07-4.68) and having  $\geq 10$  paying sexual  
42 partners in the past 3 months (aOR 3.13; 95%CI 1.40-6.98). High risk alcohol use was  
43 associated with reporting sex work as the main job (aOR 3.19; 95%CI 1.02-9.94) and  
44 having experienced physical (aOR 1.96 95%CI 1.01-3.81) or emotional violence (aOR  
45 2.08; 95%CI 1.14-3.82) from sexual partners.

46 **Conclusion:** Illicit drug and high-risk alcohol use are prevalent among adolescents  
47 involved in high risk sexual behavior and living in urban slums of Kampala.  
48 Comprehensive interventions that target substance use among this group of young  
49 people are needed and should include measures against intimate partner violence.

50

51 **Key words:**

52 Adolescents, Illicit drug use, High risk alcohol use, Urban slums, Sub Saharan Africa.

53

## 54 **1. Introduction**

55 According to the 2021 United Nations Office on Drugs and Crime (UNODC) report, the  
56 global burden of illicit drug and alcohol use is estimated at 275 million people, an increase  
57 of 21.7% from 226 million people in 2010 (1). In 2015 illicit drug use cost the human  
58 population tens of millions of disability adjusted life years (DALYs). Europeans suffered  
59 proportionately more but in absolute terms the mortality rate was greatest in low and  
60 middle income countries (LMICs) where data availability was more limited due to  
61 underestimation of illicit drug use (2). DALY rates of illicit drug use are estimated to be  
62 2.5 times higher in Sub-Saharan Africa (SSA) than other regions (3). Alcohol and illicit  
63 drug use are a major threat to education, health and the economy (1, 2, 4-6), contributing  
64 to 5.1% morbidity and 5.3% mortality worldwide. In 2015, 450,000 people died as a result  
65 of illicit drug use; 37.3% of deaths were a direct result of drug use disorders (4, 7).  
66 UNODC report that according to the demographic surveys it is projected that by 2030, the  
67 number of people using illicit drugs will have risen by 11% globally and 40% in SSA due  
68 to its rapidly growing and young population (1). The predictors of illicit drug use among

69 adolescent's world over include male gender, peer pressure, low education, psychological  
70 factors and increasing poverty levels (8-10). Illicit drug and alcohol use contribute to  
71 crime, disease, physical and mental incapacitation (1, 5, 11) in both adolescents and  
72 adults, however the impact on adolescents with developing minds and bodies may be  
73 more profound.

74 Adolescents are defined by the World Health Organization (WHO) as individuals 10-19  
75 year (12). The global adolescent population is estimated at 1.2 billion, representing one  
76 fifth of the global population (3). Surveys among the general population show that the  
77 extent of drug use among young people remains higher than among older people. Most  
78 research suggests that early (12-14 years) to mid (15-17 years) adolescence is a critical  
79 risk period for the initiation of substance use, and that use of substances like alcohol and  
80 illicit drugs may peak in late adolescence (18-19 years) and among young people aged  
81 20-24 years (7). Illicit drug and alcohol use increase with age (11, 13) and health  
82 behaviors adopted during adolescence such as use of substances have implications that  
83 can persist throughout the life course (14). The WHO 2018 global status report on alcohol  
84 and health estimates current alcohol use among 15-17 year-olds in SSA at 21.4% (4).  
85 Furthermore, a systematic review of studies done in SSA found that the overall  
86 prevalence of any substance use among adolescents was 41.6% (15). Reports show that  
87 the risk of illicit drug and alcohol use among adolescents in SSA is increased by key  
88 drivers such as: transactional sex, availability of disposable income, poverty, gender  
89 inequalities and poor work/ living environments (16, 17). Negative effects of illicit drug  
90 and alcohol use on adolescents are associated with increased risky behaviors that  
91 increase the likelihood of HIV infection, and addictive disorders that commonly result in

92 mental illness (11, 16). There are various family, economic and social factors that  
93 predispose adolescents to illicit drug and alcohol use in SSA e.g., prolonged separation  
94 from family, unstable housing, availability of drugs in the environment and feelings of  
95 loneliness (10, 11, 13). Although a number of interventions have been suggested to  
96 reduce illicit drug use in SSA, the evidence of benefit for them is weak (18, 19) and despite  
97 the proven dangers of illicit drug use, it persists, and in some contexts increases even  
98 with interventions (1). For example, the percentage of adolescents who perceive cannabis  
99 as harmful has dropped by 40% despite the evidence linking regular use to health  
100 problems particularly in young people and despite the positive correlation between  
101 potency and harm (1).

102 In Uganda, the burden of illicit drug and alcohol use is high among school-going  
103 individuals, fisher folk, slum-dwelling adolescents and young women involved in high risk  
104 sexual behaviors (9, 10, 17, 20-22) yet this population remains under studied (17). A study  
105 done in northern and central Uganda found that two thirds of school going adolescents  
106 had ever used drugs (21). Previous studies done in Kampala the capital city and fishing  
107 communities in Uganda show that illicit drug and alcohol use among adolescents are  
108 associated with sexual risk behaviors such as high numbers of paying sexual partners  
109 and inconsistent condom use (10, 17) Unregulated marketing and availability of cheap  
110 drugs, alcohol and alcohol branded merchandise to adolescents has increased access to  
111 these substances (9, 10, 17, 20). However, few studies have described illicit drug and  
112 high-risk alcohol use among adolescents and data are limited among adolescents living  
113 in urban slums where use of these substances may be more prevalent.

114 In this study among male and female adolescents from urban slums in Kampala, we  
115 assessed the prevalence and baseline factors associated with illicit drug and high-risk  
116 alcohol use.

## 117 **2. Methodology**

### 118 **2.1. Study design and setting**

119 We conducted a cross sectional study using data collected in a cohort that recruited  
120 adolescents. The main aim of the adolescent cohort was to assess “*Feasibility of Enrolling  
121 and Retaining Adolescents at Risk of HIV infection*” (FERDAR). Participants were  
122 recruited at the Good Health for Women Project (GHWP) clinic which was established in  
123 a peri-urban community in southern Kampala in 2008 to study the epidemiology of HIV  
124 and sexually transmitted infections (STIs) and to implement HIV/STI prevention among  
125 high-risk women with a focus on female sex workers. The GHWP clinic offered  
126 comprehensive HIV prevention, care and treatment services to the women, their children  
127 below 5 years and regular male partners.

### 128 **2.2. Study population and recruitment**

129 Recruitment for the FERDAR cohort was done from 25-March-2019 to 30-March-2020  
130 through a project field worker who mobilized 14-19-year-old female and male adolescents  
131 from six urban slums in and around Kampala. Participants <18 years met criteria as being  
132 mature or emancipated minors as per guidelines of the Uganda National Council for  
133 Science and Technology (UNCST) (23). These communities were characterized by sex  
134 work, alcohol selling venues and illicit drug consumption. Community awareness sessions  
135 were held to inform communities and adolescents about the research activities of the

136 project. Adolescents were initially identified by project field workers with support from  
137 community mobilisers and later invited to the GHWP clinic for screening and enrolment.  
138 Participants enrolled in the study also mobilized peers using a snowball approach.

139  
140 **2.3. Eligibility criteria:** Adolescents who were included in the study were 14-19-years  
141 (consenting adolescents 18-19 years, emancipated and/ or mature minors if <18 years)  
142 as per the National guidelines (23), sexually active in the last three months, and willing to  
143 return to the clinic every 3 months for study procedures.

144  
145 **2.4. Enrolment:** Enrolment procedures included HIV counselling and testing),  
146 participants who tested HIV positive were enrolled in the study and linked to test and treat  
147 program at GHWP for anti-retroviral therapy, screening and treatment for sexually  
148 transmitted infections (STIs), a genital swab for STI testing (chlamydia, gonorrhoea) and a  
149 syphilis sample was collected. Participants found positive with STIs were given treatment,  
150 and their partners were invited for testing and treatment. Contraceptive refills and  
151 pregnancy tests done for female adolescents and those found pregnant were enrolled  
152 and linked to ante-natal care services. We collected data on socio-demographic, sexual  
153 behavior and reproductive health variables, illicit drug use in the past three months before  
154 enrolment using the social-demographic risk behavior questionnaire and recent alcohol  
155 use using AUDIT questionnaire. Illicit drug and high-risk alcohol use counselling was  
156 offered to enrolled participants.

157  
158 **2.5. Counselling for high-risk alcohol and illicit drug use**

159 Simple advice on reduction of low risk and hazardous drinking (1-7 and 8-15 AUDIT  
160 scores, respectively) was given, brief counseling and continued monitoring was provided  
161 for high risk/harmful alcohol use (16-19 AUDIT scores), diagnostic evaluation for alcohol  
162 dependence ( $\geq 20$  AUDIT scores) and referral was recommended as in the WHO AUDIT  
163 tool guidelines for use in primary care, second edition (24)

164

## 165 **2.6. Laboratory Procedures:**

166 HIV testing was done on serum using the Ministry of Health (MoH) algorithm (Determine,  
167 Statpak and SD Bioline) where positive Determine was confirmed by Statpak and SD  
168 Bioline was used as a tie-breaker. Serum syphilis testing used the Rapid Plasma Reagin  
169 (RPR) for screening and treponema pallidum particle agglutination assay (TPPA) as  
170 confirmatory test. A genital swab was taken for STI testing (chlamydia, gonorrhea) using  
171 Roche Cobas x4800 Real time polymerase chain reaction. Pregnancy test for females  
172 was done on urine, Human Chorionic Gonadotrophin Hormone using pal urine dip stick  
173 strip.

## 174 **2.7. Data Collection:**

175 Trained research assistants collected data using interviewer administered questionnaires  
176 that were translated to the local language of the area (Luganda). Both English and  
177 Luganda version of the questionnaires were available depending on the participant's  
178 language of choice.

## 179 **2.8. Study variables**

### 180 **2.8.1. Dependent (outcome) variables included;**



- 181 • Illicit drug use in the 3 months before enrolment. Data was collected as a binary  
182 variable (Yes/ No);
- 183 • High-risk alcohol consumption at enrolment, a binary variable (Yes/ No). Alcohol  
184 use was collected as a numerical variable (Baseline AUDIT score) and then  
185 categorized into high risk (AUDIT score  $\geq 16$ ) vs. low to moderate risk (0-15)

## 186 **2.8.2. Independent variables included;**

187 Social demographic variables included participant current age, age at first sexual  
188 intercourse, average monthly income, marital status, gender, level of education, sexual  
189 and reproductive health variables; the latter included total number of sexual partners in  
190 the 3 months before enrolment, number of biological children, number of abortions and  
191 miscarriages ever experienced, experience of intimate partner violence (IPV) from sexual  
192 partners in the past 3 months (yes/ no), engaging in paid sex in the past 3 months (yes/  
193 no), condom use with partners at the last sexual encounter (yes/ no), type of sexual  
194 partner (regular partner living together, regular partners not living together, paying  
195 partners, casual acquaintance or any other partners), and contraceptive use for females  
196 (yes/ no).

## 197 **2.9. Statistical Analysis;**

198 Data were double entered in Open Clinica, cleaned and exported to Stata17.0 (Stata  
199 Corp, College Station, TX, USA) for further management and analysis. The participants'  
200 characteristics were summarized in descriptive terms such as mean, median, standard  
201 deviations or percentage, as appropriate. The proportions of illicit drug use and high-risk  
202 alcohol use at baseline were calculated as proportions of the total number enrolled.

203 Factors associated with illicit drug use in the past 3 months and high-risk alcohol use at  
204 baseline were determined for each outcome and each independent variable using logistic  
205 regression. Bivariate/unadjusted logistic regression analysis was conducted and  
206 variables with p-value < 0.15 were considered for the adjusted, multivariable analysis.  
207 Multivariable logistic regression was used to identify the factors that are independently  
208 associated with illicit drugs and high-risk alcohol use. Each outcome was considered  
209 separately, with its own model. In the multivariable analysis, variables were kept in the  
210 model if removing them significantly affected model fit. Variables that had a P-value <0.05  
211 were considered significantly associated with illicit drug and high-risk alcohol use. In both  
212 models, we considered age at enrolment and sex as priori confounders that were included  
213 in the multivariable models regardless of its unadjusted p-values.

214

## 215 **2.10. Ethical considerations**

216 The study was reviewed and approved by the Uganda National council for science and  
217 technology (HS 2493) and the Uganda Virus Research Institute Research Ethics  
218 committee (GC/127/18/09/658). Written Informed Consent was obtained from every  
219 participant.

## 220 **3. Results:**

### 221 **3.1. Baseline characteristics of enrolled participants.**

222 We included 490 participants in our analysis; 297 (60.6%) females and 193 males. The  
223 median age of participants was 18 (IQR 17-18) years, 50.8% were ≥18years, 91.0% had  
224 less than secondary education and 97.3% were out of school at the time of enrollment.

225 Of 237 (48.4%) adolescents who had their sexual debut before 15years, 56.5% were  
 226 female vs 43.5% males. Participants who had any STI (chlamydia, gonorrhoea and/or  
 227 active syphilis) at enrollment were 24.7%, of whom 84.7% were female. Of 231 (47.1%)  
 228 who reported paid sex in the past 3 months, 94.4% were female. Among the 219 females  
 229 who reported paid sex in the past 3 months, 75.0% had less than secondary education.  
 230 Adolescents reporting more than one sexual partner were 332 (67.8%) of whom 62.9%  
 231 were female. Female adolescents using contraception were 59.2%. Of 154 (31.4%) who  
 232 had biological children 90.9% were females, of whom 10.0% had  $\geq 2$  biological children  
 233 (Table 1).

234 **Table 1: Baseline Characteristics of Adolescents Enrolled from Kampala Slums,**  
 235 **Uganda**

| Variable          | Category        | Males<br>n (%col) | Females<br>n (%col) | Total<br>n (%col) |
|-------------------|-----------------|-------------------|---------------------|-------------------|
| <b>Overall</b>    |                 | 193(39.4)         | 297(60.6)           | 490(100)          |
| Age at enrollment |                 |                   | 152(51.2)           |                   |
|                   | 14-17years      | 89(46.1)          | )                   | 241(49.2)         |
|                   |                 | 104(53.9)         | 145(48.8)           |                   |
|                   | $\geq 18$ years | )                 | )                   | 249(50.8)         |
| Education level   |                 |                   |                     |                   |
|                   | None            | 10(5.2)           | 20(6.7)             | 30(6.1)           |

|                              |                         |          |          |           |
|------------------------------|-------------------------|----------|----------|-----------|
|                              |                         | 172(89.1 | 244(82.2 |           |
|                              | Less than secondary     | )        | )        | 416(84.9) |
|                              | Secondary/higher        | 11(5.7)  | 33(11.1) | 44(9.0)   |
| <hr/>                        |                         |          |          |           |
| Age-first sexual intercourse |                         |          |          |           |
|                              |                         | 103(53.4 | 134(45.1 |           |
|                              | <15 years               | )        | )        | 237(48.4) |
|                              |                         |          | 163(54.9 |           |
|                              | ≥15 years               | 90(46.6) | )        | 253(51.6) |
| <hr/>                        |                         |          |          |           |
| Marital status               |                         |          |          |           |
|                              |                         | 174(90.2 | 203(68.4 |           |
|                              | Never married           | )        | )        | 377(77.1) |
|                              | Currently married       | 13(6.7)  | 52(17.5) | 65(13.3)  |
|                              | Separated/<br>/Divorced | 6(3.1)   | 42(14.1) | 48(9.6)   |
| <hr/>                        |                         |          |          |           |
| Have biological children     |                         |          |          |           |
|                              |                         |          | 140(47.1 |           |
|                              | Yes                     | 14(7.3)  | )        | 154(31.4) |
|                              |                         | 179(92.7 | 157(52.9 |           |
|                              | No                      | )        | )        | 336(68.6) |
| <hr/>                        |                         |          |          |           |
| No of biological Children    |                         |          |          |           |
|                              |                         | 179(92.8 | 157(52.9 |           |
|                              | None                    | )        | )        | 336(68.6) |

|                                                |          |           |           |           |
|------------------------------------------------|----------|-----------|-----------|-----------|
|                                                |          |           | 126(42.4) |           |
|                                                | 1        | 12(6.2)   | )         | 138(28.2) |
|                                                | ≥2       | 2(1.1)    | 14(4.7)   | 16(3.2)   |
| <hr/>                                          |          |           |           |           |
| Monthly Income (\$).                           |          |           |           |           |
|                                                | None     | 4(2.1)    | 59(19.9)  | 63(12.9)  |
|                                                |          |           | 105(35.4) |           |
|                                                | < 30\$   | 54(28.0)  | )         | 159(32.4) |
|                                                |          | 127(65.8) | 128(43.0) |           |
|                                                | 30-115\$ | )         | )         | 255(52.0) |
|                                                | >115\$   | 8 (4.1)   | 5(1.7)    | 13(2.7)   |
| <hr/>                                          |          |           |           |           |
| No of sexual partners in the past three months |          |           |           |           |
|                                                | 1        | 70(36.3)  | 88(29.6)  | 158(32.2) |
|                                                |          | 123(63.7) | 209(70.4) |           |
|                                                | ≥2       | )         | )         | 332(67.8) |
| <hr/>                                          |          |           |           |           |
| Paid sex in the past 3 months                  |          |           |           |           |
|                                                |          |           | 219(73.7) |           |
|                                                | Yes      | 12(6.2)   | )         | 231(47.1) |
|                                                |          | 181(93.8) |           |           |
|                                                | No       | )         | 78(26.3)  | 259(52.9) |
| <hr/>                                          |          |           |           |           |
| Current use of illicit drugs                   |          |           |           |           |
|                                                |          | 119(61.7) |           |           |
|                                                | Yes      | )         | 52(17.5)  | 171(34.9) |

|                                                       |     |           |           |           |
|-------------------------------------------------------|-----|-----------|-----------|-----------|
|                                                       |     |           | 245(82.5) |           |
|                                                       | No  | 74(38.3)  | )         | 319(65.1) |
| <hr/>                                                 |     |           |           |           |
| High-risk alcohol drinking                            |     |           |           |           |
|                                                       | Yes | 21(10.9)  | 58(19.5)  | 79(16.1)  |
|                                                       |     | 172(89.2) | 239(80.5) |           |
|                                                       | No  | )         | )         | 411(83.9) |
| <hr/>                                                 |     |           |           |           |
| On contraception*                                     |     |           |           |           |
|                                                       |     | –         | 158(59.2) |           |
|                                                       | Yes |           | )         | 158(53.2) |
|                                                       |     |           | 109(40.8) |           |
|                                                       | No  | –         | )         | 109(36.7) |
| <hr/>                                                 |     |           |           |           |
| Ever tested for HIV                                   |     |           |           |           |
|                                                       |     | 130(67.4) | 262(88.2) |           |
|                                                       | Yes | )         | )         | 392(80)   |
|                                                       | No  | 63(32.6)  | 35(11.8)  | 98(20)    |
| <hr/>                                                 |     |           |           |           |
| Any STI (chlamydia, gonorrhea and/or active syphilis) |     |           |           |           |
|                                                       | Yes | 28(14.5)  | 93(31.3)  | 121(24.7) |
|                                                       |     | 165(85.5) | 204(68.7) |           |
|                                                       | No  | )         | )         | 369(75.3) |

236 \* Only females, defined as reporting contraception (3monthly Depo Provera  
 237 injection, Intra Uterine Contraceptive Device (IUCD), Combined oral contraceptives  
 238 and implant.)

239 **3.2. Illicit drug and high-risk alcohol use among adolescents.**

240 At enrollment, 224 participants had ever used illicit drugs of whom 141 (62.9%) were  
241 male. Current Illicit drug users (past 3 months) were 171 (34.9%) with the proportion of  
242 those using Illicit drugs among males significantly higher than females (69.6% vs 30.4%,  
243  $p < 0.001$ ), and 86 participants (50.3%) of current drug users reported using drugs daily  
244 (76.7% male's vs 23.3% females), 68 (39.7%) reported using drugs once a week (64.7%  
245 males' vs 35.3% females) while the rest used drugs less frequently. The most commonly  
246 used drugs for both males and females were marijuana (49.7%) and Khat (15.8%).  
247 Reasons given by males for taking illicit drugs were: to forget their problems (31.9%), to  
248 feel good (24.4%), peer pressure (11.8%), to get courage so they could do their work  
249 (3.4%) and other reasons (28.6%). Reasons given by females were peer pressure  
250 (28.9%), to feel good (23.1%), to get courage to engage in sex work (19.2%), and other  
251 reasons (28.9%).

252 Of the 490 participants, 79 (16.1%) were screened as high-risk alcohol users. And the  
253 proportion of high-risk alcohol use was 58 (73.4) among females Vs 21(26.6) males. At  
254 the unadjusted analysis, high-risk alcohol use was more likely among those who identified  
255 their main job as sex work, those with  $\geq 10$  paying sexual partners in the last 3 months,  
256 those who experienced any violence (Physical, sexual and emotional) from sexual  
257 partners in the last three months prior to the interview. The median (Interquartile range,  
258 IQR) of the audit score among high risk alcohol users was 20 (17-23) while among the  
259 non-high risk alcohol users was 1(0-6).

### 260 **3.3. Baseline characteristics associated with illicit drug.**

261 At adjusted analysis, baseline characteristics associated with illicit drug use in the past 3  
 262 months were male gender (aOR 11.1; 95% CI 6.78-18.1) compared to females, being  
 263 married (aOR 2.01; 95%CI 1.02-3.96) compared to being single and having 10 or more  
 264 paying sexual partners (aOR 3.44; 95%CI 1.56-7.55) compared to reporting fewer than  
 265 10 (Table 2).

266 **Table 2: Association of participants' baseline characteristics with illicit drug use in**  
 267 **the past 3 months.**

| Baseline Characteristics | Overall N=490<br>n<br>(%col) | Used illicit drugs<br>(n=171)<br>n(row%) | Unadjusted OR (95% CI) | P-value | Adjusted* OR (95% CI)  | P-value          |
|--------------------------|------------------------------|------------------------------------------|------------------------|---------|------------------------|------------------|
| Age at enrolment         |                              |                                          |                        |         |                        |                  |
| 15-17                    | 241(49.2)                    | 82(34)                                   | 1(ref)                 |         | 1(ref)                 |                  |
| 18-19                    | 249(50.8)                    | 89(36)                                   | 1.08(0.74-1.56)        | 0.69    | 0.99(0.65-1.52)        | 0.970            |
| Sex                      |                              |                                          |                        |         |                        |                  |
| Female                   | 297(60.6)                    | 52(18)                                   | 1(ref)                 |         | 1(ref)                 |                  |
| Male                     | 193(39.4)                    | 119(62)                                  | 7.58(4.99-11.49)       | <0.001  | <b>11.1(6.78-18.1)</b> | <b>&lt;0.001</b> |



Cater for own

livelihood

|     |         |         |            |       |   |  |
|-----|---------|---------|------------|-------|---|--|
|     | 82(16.7 |         |            |       |   |  |
| No  | )       | 15(18)  | 1(ref)     |       |   |  |
|     | 408(83. |         | 2.77(1.53- |       |   |  |
| Yes | 3)      | 156(38) | 5.01)      | 0.001 | - |  |

---

Marital status.

|                    |         |         |            |       |                   |              |
|--------------------|---------|---------|------------|-------|-------------------|--------------|
|                    | 377(76. |         |            |       |                   |              |
| Single             | 9)      | 135(36) | 1(ref)     |       | 1(ref)            |              |
|                    |         |         | 0.81(0.43- |       | 1.85(0.88-        |              |
| Separated/divorced | 48(9.8) | 15(31)  | 1.55)      | 0.534 | 3.91)             | 0.107        |
|                    | 65(13.3 |         | 0.86(0.49- |       | <b>2.01(1.02-</b> |              |
| Married            | )       | 21(32)  | 1.49)      | 0.586 | <b>3.96)</b>      | <b>0.043</b> |

---

Ever been to school

|     |         |         |            |       |   |  |
|-----|---------|---------|------------|-------|---|--|
|     | 460(93. |         |            |       |   |  |
| Yes | 9)      | 159(35) | 1(ref)     |       |   |  |
|     |         |         | 1.26(0.59- |       |   |  |
| No  | 30(6.1) | 12(40)  | 2.69)      | 0.546 | - |  |

---

Education level

Secondary or

|            |         |         |            |       |   |  |
|------------|---------|---------|------------|-------|---|--|
| higher     | 44(9.0) | 9(20)   | 1(ref)     |       |   |  |
| Less than  | 446(91. |         | 2.22(1.04- |       |   |  |
| secondary. | 0)      | 162(36) | 4.73)      | 0.039 | - |  |

---

### Age at first Job

|                       |         |        |            |       |   |
|-----------------------|---------|--------|------------|-------|---|
|                       | 187(38. |        |            |       |   |
| First job < 15yrs     | 2)      | 80(43) | 1(ref)     |       |   |
|                       | 303(61. |        | 0.52(0.35- |       |   |
| First job at >= 15yrs | 8)      | 91(30) | 1.76)      | 0.001 | - |

---

### Main job

|            |         |         |            |       |   |
|------------|---------|---------|------------|-------|---|
|            | 52(10.6 |         |            |       |   |
| Sex work   | )       | 17(33)  | 1(ref)     |       |   |
|            | 60(12.2 |         | 0.46(0.19- |       |   |
| No job     | )       | 11(18)  | 1.11)      | 0.083 |   |
|            | 378(77. |         | 1.25(0.68- |       |   |
| Other jobs | 1)      | 143(38) | 2.32)      | 0.473 | - |

---

### Paying sexual partners in the last 3

months

|               |         |         |            |       |                           |
|---------------|---------|---------|------------|-------|---------------------------|
|               | 453(92. |         |            |       |                           |
| <10 partners  | 4)      | 158(35) | 1(ref)     |       | 1 (ref)                   |
|               |         |         | 1.01(0.50- |       | <b>3.44(1.56-</b>         |
| >=10 partners | 37(7.6) | 13(35)  | 2.04)      | 0.975 | <b>7.55)</b> <b>0.002</b> |

---

### Reported condom use with paying partners in the last 3

months

|              |         |        |        |  |  |
|--------------|---------|--------|--------|--|--|
|              | 154(66. |        |        |  |  |
| Inconsistent | 1)      | 36(23) | 1(ref) |  |  |

|                                                                                              |           |         |            |       |   |
|----------------------------------------------------------------------------------------------|-----------|---------|------------|-------|---|
|                                                                                              | 79(33.9)  |         | 1.03(0.54- |       |   |
| Consistent                                                                                   | )         | 19(24)  | 1.96)      | 0.909 | - |
| <hr/>                                                                                        |           |         |            |       |   |
| Experienced physical violence from sexual partners in the past 3 months                      |           |         |            |       |   |
|                                                                                              | 427(87.1) |         | 1(ref)     |       |   |
| No                                                                                           | )         | 148(35) | 1.08(0.63- |       |   |
|                                                                                              | 63(12.9)  |         | 1.88)      | 0.774 | - |
| Yes                                                                                          | )         | 23(37)  |            |       |   |
| <hr/>                                                                                        |           |         |            |       |   |
| Ever experienced sexual violence from sexual partners in the past 3 months                   |           |         |            |       |   |
|                                                                                              | 401(81.8) |         | 1(ref)     |       |   |
| No                                                                                           | )         | 157(35) | 1.09(0.55- |       |   |
|                                                                                              | 89(18.2)  |         | 2.18)      | 0.794 | - |
| Yes                                                                                          | )         | 14(37)  |            |       |   |
| <hr/>                                                                                        |           |         |            |       |   |
| Ever experienced psychological /emotional Violence from sexual partners in the past 3 months |           |         |            |       |   |
|                                                                                              | 403(74.9) |         | 1(ref)     |       |   |
| No                                                                                           | )         | 138(34) | 1.17(0.73- |       |   |
|                                                                                              | 87(25.1)  |         | 1.89)      | 0.513 | - |
| Yes                                                                                          | )         | 33(38)  |            |       |   |

268 \*adjusted for age, sex, marital status, attending school, first job, whether one caters for  
 269 their own livelihood, paid sex at last sexual encounter and violence from sexual partners;  
 270 OR = odds ratio

271

272 **3.4. Baseline characteristics associated with high-risk alcohol use**

273 At adjusted analysis, baseline characteristics associated with high-risk alcohol use were  
 274 reporting sex work as a main job (aOR 4.22; 95%CI 1.49-11.9) compared to being  
 275 unemployed and having experienced physical (aOR 2.02 95%CI 1.06-3.87) and or  
 276 emotional violence (aOR 2.35 95%CI 1.32-4.18) from sexual partners, compared to those  
 277 who did not report these respective types of IPV (Table 3).

278 **Table 3: Association of participants' baseline characteristics with high risk alcohol**  
 279 **use.**

| Baseline Characteristics | Overall<br>N=490<br>n (%col) | High risk<br>alcohol use<br>(n=79)<br>n(row%) | Unadjusted<br>OR (95% CI) | P-<br>value | Adjusted*<br>OR (95% CI) | P-value |
|--------------------------|------------------------------|-----------------------------------------------|---------------------------|-------------|--------------------------|---------|
| Age at enrolment         |                              |                                               |                           |             |                          |         |
| 15-17                    | 241(49.2)                    | 37(15)                                        | 1(ref)                    |             | 1(ref)                   |         |
| 18-19                    | 249(50.8)                    | 42(17)                                        | 1.12(0.69-1.81)           | 0.649       | 1.25(0.75-2.07)          | 0.392   |
| Sex                      |                              |                                               |                           |             |                          |         |
| Female                   | 297(60.6)                    | 58(20)                                        | 1(ref)                    |             | 1(ref)                   |         |
| Male                     | 193(39.4)                    | 21(11)                                        | 0.50(0.29-0.86)           | 0.012       | 0.59(0.33-1.07)          | 0.084   |

| <b>Baseline Characteristics</b> | <b>Overall<br/>N=490<br/>n (%col)</b> | <b>High risk<br/>alcohol use<br/>(n=79)<br/>n(row%)</b> | <b>Unadjusted<br/>OR (95% CI)</b> | <b>P-<br/>value</b> | <b>Adjusted*<br/>OR (95% CI)</b> | <b>P-value</b> |
|---------------------------------|---------------------------------------|---------------------------------------------------------|-----------------------------------|---------------------|----------------------------------|----------------|
| <b>Cater for own livelihood</b> |                                       |                                                         |                                   |                     |                                  |                |
| Yes                             | 82(16.7)                              | 65(16)                                                  | 1(ref)<br>1.09(0.58-              |                     |                                  |                |
| No                              | 408(83.3)                             | 14(17)                                                  | 2.05)                             | 0.798               | -                                |                |
| <b>Marital status</b>           |                                       |                                                         |                                   |                     |                                  |                |
| Single                          | 377(76.9)                             | 55(15)                                                  | 1(ref)<br>1.35(0.62-              |                     |                                  |                |
| Separated/divorced              | 48(9.8)                               | 9(19)                                                   | 2.94)<br>1.76(0.92-               | 0.449               |                                  |                |
| Married                         | 65(13.3)                              | 15(23)                                                  | 3.34)                             | 0.086               | -                                |                |
| <b>Ever been to school</b>      |                                       |                                                         |                                   |                     |                                  |                |
| Yes                             | 460(93.9)                             | 72(16)                                                  | 1(ref)<br>1.64(0.68-              |                     |                                  |                |
| No                              | 30(6.1)                               | 7(23)                                                   | 3.96)                             | 0.272               | -                                |                |
| <b>Education level</b>          |                                       |                                                         |                                   |                     |                                  |                |
| Less than secondary             | 44(9.0)                               | 72(16)                                                  | 1(ref)<br>0.98(0.42-              |                     |                                  |                |
| Secondary or higher             | 446(91.0)                             | 7(16)                                                   | 2.29)                             | 0.968               | -                                |                |

| Baseline Characteristics                                       | Overall<br>N=490<br>n (%col) | High risk<br>alcohol use<br>(n=79)<br>n(row%) | Unadjusted<br>OR (95% CI) | P-<br>value | Adjusted*<br>OR (95% CI)    | P-value      |
|----------------------------------------------------------------|------------------------------|-----------------------------------------------|---------------------------|-------------|-----------------------------|--------------|
| Age at first Job                                               |                              |                                               |                           |             |                             |              |
| First job at < 15yrs                                           | 187(38.2)                    | 33(18)                                        | 1(ref)<br>0.82(0.50-      |             |                             |              |
| First job at >= 15yrs                                          | 303(61.8)                    | 46(15)                                        | 1.36)                     | 0.452       | -                           |              |
| Main job                                                       |                              |                                               |                           |             |                             |              |
| No job                                                         | 52(10.6)                     | 6(10)                                         | 1(ref)<br>4.37(1.57-      |             | 1(ref)<br><b>4.22(1.49-</b> | <b>0.007</b> |
| Sex work                                                       | 60(12.2)                     | 17(33)                                        | 12.16)<br>1.57(0.64-      | 0.005       | <b>11.9)</b><br>1.90(0.75-  | 0.175        |
| Other Jobs                                                     | 378(77.1)                    | 56(15)                                        | 3.81)                     | 0.324       | 4.81)                       |              |
| Paying sexual partners in the last 3 months.                   |                              |                                               |                           |             |                             |              |
| <10 partners                                                   | 453(92.4)                    | 66(15)                                        | 1(ref)<br>3.18(1.54-      |             |                             |              |
| >=10 partners                                                  | 37(7.6)                      | 13(35)                                        | 6.55)                     | 0.002       | -                           |              |
| Reported condom use with paying partners in the last 3 months. |                              |                                               |                           |             |                             |              |
| Inconsistent                                                   | 154(66.1)                    | 40(26)                                        | 1(ref)<br>0.72(0.38-      |             |                             |              |
| Consistent                                                     | 79(33.9)                     | 16(20)                                        | 1.39)                     | 0.334       | -                           |              |

| Baseline Characteristics                                                                     | Overall<br>N=490<br>n (%col) | High risk<br>alcohol use<br>(n=79)<br>n(row%) | Unadjusted<br>OR (95% CI) | P-<br>value | Adjusted*<br>OR (95% CI)    | P-value      |
|----------------------------------------------------------------------------------------------|------------------------------|-----------------------------------------------|---------------------------|-------------|-----------------------------|--------------|
| Experienced physical violence from sexual partners in the past 3 months                      |                              |                                               |                           |             |                             |              |
| No                                                                                           | 427(87.1)                    | 60(14)                                        | 1(ref)<br>2.64(1.44-      |             | 1(ref)<br><b>2.02(1.06-</b> |              |
| Yes                                                                                          | 63(12.9)                     | 19(30)                                        | 4.83)                     | 0.002       | <b>3.87)</b>                | <b>0.034</b> |
| Ever experienced sexual violence from sexual partners in the past 3 months                   |                              |                                               |                           |             |                             |              |
| No                                                                                           | 401(81.8)                    | 65(15)                                        | 1(ref)<br>3.47(1.70-      |             |                             |              |
| Yes                                                                                          | 89(18.2)                     | 14(36)                                        | 7.06)                     | 0.001       | -                           |              |
| Ever experienced psychological /emotional Violence from sexual partners in the past 3 months |                              |                                               |                           |             |                             |              |
| No                                                                                           | 403(82.2)                    | 53(13)                                        | 1(ref)<br>2.81(1.64-      |             | 1(ref)<br><b>2.35(1.32-</b> |              |
| Yes                                                                                          | 87(17.8)                     | 26(30)                                        | 4.84)                     | <0.001      | <b>418)</b>                 | <b>0.004</b> |

280 \*adjusted for age, sex, attending school, whether one caters for their own livelihood, paid

281 sex at last sexual encounter; OR = Adjusted odds ratio

282 **4. Discussion**

283 Our study found a high prevalence of illicit drug and high-risk alcohol use among 14-19-  
284 year old adolescents, and this is similar to other studies done among at-risk adolescents  
285 in similar vulnerable situations (15, 20). This is perhaps not surprising, given that the  
286 source GHWP clinic provides services to participants from Kampala slums that are  
287 characterized by a high prevalence of crime, illicit drug and alcohol use (25); this  
288 environment exposed adolescents to use these substances. However, our findings differ  
289 from a study done by Berhane et al in nine communities in SSA that reported very low  
290 prevalence of alcohol and illicit drug use among both school and non-school going  
291 adolescents 10-19-years (14), which the authors suggest may be attributed to under  
292 reporting. We found that adolescents who most abused drugs were taking care of  
293 themselves with no or under employment and this is in line with the recent warning from  
294 UNODC that increasing drug use rates are becoming more pronounced in countries with  
295 low levels of income (1).

296 Illicit drug use in our study was associated with being male and is consistent with similar  
297 studies done in Uganda, SSA and other parts of the world (10, 26, 27). Male participants  
298 in our cohort were married young, some had more than 10 paying sexual partners in the  
299 last three months before enrolment and some experienced IPV from their sexual partners,  
300 they therefore likely resorted to use of drugs to mainly forget their problems caused by  
301 adolescent marriages, experiences of IPV from sexual partners (28, 29) and also to feel  
302 good. Indeed, we observed in this study that more than half of male participants who used  
303 drugs reported using drugs as a coping mechanism to mainly forget their problems and  
304 to feel good (21, 30). We further found that marijuana and khat were the most used drugs  
305 by adolescents (Figure 1) which is similar to studies done in Uganda and SSA (10, 11,



306 21). These two drugs are locally available and cheap to purchase which makes it more  
307 accessible and affordable to adolescents with low levels of income compared to other  
308 drugs (10).

309 We found that illicit drug use was associated to being married which differs from another  
310 study done in Uganda in fishing communities that portrayed association of illicit drug use  
311 to being single (10), this was attributed to the fact that most of the married participants in  
312 this study got married young, and studies done in SSA show that adolescents living in  
313 informal settlements are more likely to be staying on their own, with friends or indulge in  
314 early marriages and thus lack formal parental control which expose them to riskier  
315 behaviors such as drug use, sex work, Intimate Partner Violence as observed in this  
316 study with subsequent high maternal and child mortality (28, 29, 31, 32)

317 Our findings also indicated that participants who reported engaging in sex work as their  
318 main job were 3-times more likely to be screened as high risk alcohol users compared to  
319 those who reported other main jobs, and having 10 or more paying partners was also  
320 associated with high risk alcohol use (8). Almost three quarters of our enrolled females  
321 reported engaging in paid sex in the past 3 months and most had low or no education.  
322 Sex work has been associated with alcohol use because women consume alcoholic  
323 drinks that clients buy for them (33), sex work sometimes occurs in bars and similar  
324 venues that sell alcohol (16, 33) and women report that taking alcohol gives them  
325 confidence to deal with many clients (20). Some also started sex work as their first job so  
326 took alcohol to cope with the stress of their job and other stressful issues linked to sex  
327 work e.g. discrimination, criminalization and also to cope with the cold (33, 34). The length  
328 of time involved in sex work also contributes to long-term alcohol use which can progress

329 to high risk alcohol use over time (20, 33). Others likely abused alcohol due to peer  
330 influence around them given similar age group and involvement in similar high risk  
331 behavior such as sex work. Previous research has found that adolescents who perceived  
332 their friends as drug users, socialized with drug using peers and used alcohol for coping  
333 or fun were at increased risk of illicit drug, alcohol use and misuse (35). A much broader  
334 understanding of adolescent peers and their behavior may be one of the factors in curbing  
335 illicit and high-risk alcohol use among adolescents living in urban slums.

336 We further found that adolescents who experienced physical and emotional violence from  
337 sexual partners were more likely to be high risk alcohol users (20, 36). Most of our study  
338 participants engaged in paid sex, and it has been shown that when compared to older  
339 women, young women who engage in paid sex or sex work are more vulnerable to  
340 intimate partner violence from clients (37, 38). Younger women may also struggle with  
341 negotiation skills e.g., condom use, money paid per sex act, and this disadvantage may  
342 further expose them to acts of violence (34, 39). Given that sex work sometime takes  
343 place in venues that sell alcohol, IPV may also be perpetrated by disinhibited sexual  
344 partners/ clients who consume alcohol (40). For clients who chronically engage in IPV or  
345 engage in severe forms of partner violence, alcohol interventions may have a beneficial  
346 impact and the role of alcohol in the episodes of IPV was emphasized during counseling  
347 (36). Many of these issues correlate to social economic status (SES) where women with  
348 a partner who used alcohol and was of a lower SES had higher odds of experiencing IPV  
349 compared to women with partners of higher SES (40).

#### 350 **4.1. Limitations**

351 Our study used a cross-sectional study design which limits our ability to infer causality in  
352 the associations seen between the dependent and independent outcomes. Our study was  
353 done among a unique population of adolescents that also included emancipated minors  
354 and findings may not be generalizable to adolescents in different settings and those who  
355 need parental/ guardian consent.

## 356 **5. Conclusion;**

357 Illicit drug and high risk alcohol use were prevalent among adolescents from urban slums  
358 in Kampala. Male adolescents and those who report vulnerabilities like IPV, multiple  
359 sexual partnerships and sex work have a higher prevalence of substance use.  
360 Comprehensive interventions that reduce illicit drug and high-risk alcohol use are needed  
361 among adolescents living in urban slums to prevent negative long-term health  
362 consequences that may persist into adulthood.

## 363 **Competing Interests**

364 The authors have no conflict of interest to declare.

## 365 **Availability of data and materials**

366 The datasets used and analyzed during the current study are available from the  
367 corresponding author.

## 368 **Funding Source**

369 The project is part of the EDCTP2 program supported by the European Union  
370 (TMA2016CDF-1574). The views and opinions of authors expressed herein do not  
371 necessarily state or reflect those of EDCTP.

372 **Acknowledgement;**

373 We wish to acknowledge the support from the University of California, san Francisco's  
374 international traineeships in AIDS prevention studies. (ITAPS) U.S NIMH,  
375 R25MH123256. We acknowledge study participants, community team and the research  
376 team for their dedication to the study.

377

378 **References;**

- 379 1. United Nations Office on Drugs and Crime. World Drug Report 2021.  
380 <https://www.unodc.org/>.
- 381 2. Peacock A, Leung J, Larney S, Colledge S, Hickman M, Rehm J, et al. Global  
382 statistics on alcohol, tobacco and illicit drug use: 2017 status report. *Addiction*.  
383 [2018;113\(10\):1905-26.](https://doi.org/10.1111/add.14234)
- 384 3. Davidson LL, Grigorenko EL, Boivin MJ, Rapa E, Stein A. A focus on adolescence to  
385 reduce neurological, mental health and substance-use disability. *Nature*.  
386 [2015;527\(7578\):S161-S6.](https://doi.org/10.1038/s41586-018-0300-4)
- 387 4. World Health Organization. Global status report on alcohol and health 2018 Geneva  
388 Switzerland: World Health Organization; 2018.  
389 [https://www.who.int/publications/i/item/9789241565639.](https://www.who.int/publications/i/item/9789241565639)
- 390 5. Degenhardt L, Hall W. Extent of illicit drug use and dependence, and their  
391 contribution to the global burden of disease. *The Lancet*. [2012;379\(9810\):55-70.](https://doi.org/10.1016/S0140-6736(16)00567-0)
- 392 6. Grebely MF, Degenhardt L. Global statistics on alcohol, tobacco and illicit drug  
393 use: 2017 status report. <https://doi.org/10.1111/add.14234>

- 394 7. United Nations Office on Drugs and Crime. World drug report 2018. Booklet 4.  
395 Vienna; 2018. <https://www.unodc.org/wdr2018/>
- 396 8. Francis JM, Weiss HA, Mshana G, Baisley K, Grosskurth H, Kapiga SH. The  
397 epidemiology of alcohol use and alcohol use disorders among young people in northern  
398 Tanzania. PloS one. 2015;10(10):e0140041.  
399 <https://doi.org/10.1371/journal.pone.0140041>
- 400 9. Kuteesa MO, Webb EL, Kawuma R, Naluwugge J, Thadeus K, Ndekezi D, et al. 'We  
401 shall drink until Lake Victoria dries up': Drivers of heavy drinking and illicit drug use  
402 among young Ugandans in fishing communities. Global public health. 2021:1-17.  
403 DOI: [10.1080/17441692.2021.1873399](https://doi.org/10.1080/17441692.2021.1873399)
- 404 10. Kuteesa MO, Weiss HA, Cook S, Seeley J, Ssentongo JN, Kizindo R, et al.  
405 Epidemiology of alcohol misuse and illicit drug use among young people aged 15–24  
406 years in fishing communities in Uganda. International journal of environmental research  
407 and public health. 2020;17(7):2401. <https://doi.org/10.3390/ijerph17072401>
- 408 11. Acuda W, Othieno CJ, Obondo A, Crome IB. The epidemiology of addiction in  
409 Sub-Saharan Africa: A synthesis of reports, reviews, and original articles. The American  
410 journal on addictions. 2011;20(2):87-99. [https://doi.org/10.1111/j.1521-  
411 0391.2010.00111.x](https://doi.org/10.1111/j.1521-0391.2010.00111.x)
- 412 12. WHO. Core competencies in adolescent health and development for primary care  
413 providers: including a tool to assess the adolescent health and development component  
414 in pre-service education of health-care providers: World Health  
415 Organization;2015:[https://apps.who.int/iris/bitstream/handle/10665/148354/9789241508  
416 315](https://apps.who.int/iris/bitstream/handle/10665/148354/9789241508315)

- 417 13. Ali S, Mouton CP, Jabeen S, Ofoemezie EK, Bailey RK, Shahid M, et al. Early  
418 detection of illicit drug use in teenagers. *Innovations in clinical neuroscience*. 2011;8  
419 <https://www.ncbi.nlm.nih.gov/pmc/articles/PMC3257983/>
- 420 14. Berhane Y, Canavan CR, Darling AM, Sudfeld CR, Vuai S, Adanu R, et al. The age  
421 of opportunity: prevalence of key risk factors among adolescents 10–19 years of age in  
422 nine communities in sub-Saharan Africa. *Tropical Medicine & International Health*.  
423 2020;25(1):15-32. <https://doi.org/10.1111/tmi.13339>
- 424 15. Ogundipe O, Amoo E, Adeloye D, Olawole-Isaac A. Substance use among  
425 adolescents in sub-Saharan Africa: A systematic review and meta-analysis. *South  
426 African Journal of Child Health*. 2018;2018(1):s79-s8 [https://hdl.handle.net/10520/EJC-  
427 10deb396ce4](https://hdl.handle.net/10520/EJC-10deb396ce4).
- 428 16. Kuteesa MO, Seeley J, Cook S, Webb EL. Multi-level experiences and determinants  
429 of alcohol misuse and illicit drug use among occupational groups at high-risk of HIV in  
430 sub-Saharan Africa: A thematic synthesis of qualitative findings. *Global public health*.  
431 2020;15(5):715-33. <https://doi.org/10.1080/17441692.2019.1679216>
- 432 17. Swahn MH, Culbreth R, Salazar LF, Tumwesigye NM, Jernigan DH, Kasirye R, et  
433 al. The Prevalence and Context of Alcohol Use, Problem Drinking and Alcohol-Related  
434 Harm among Youth Living in the Slums of Kampala, Uganda. *International journal of  
435 environmental research and public health*. 2020;17(7):2451. [10.3390/ijerph17072451](https://doi.org/10.3390/ijerph17072451)
- 436 18. Saba OA, Weir C, Aceves-Martins M. Substance use prevention interventions for  
437 children and young people in Sub-Saharan Africa: A systematic review. *International  
438 Journal of Drug Policy*. [2021;94:103251](https://doi.org/10.1016/j.drugpo.2021.103251).

- 439 19. Jeal N, Macleod J, Turner K, Salisbury C. Systematic review of interventions to  
440 reduce illicit drug use in female drug-dependent street sex workers. *BMJ open*.  
441 [2015;5\(11\):e009238](https://doi.org/10.1136/bmjopen-2015-000923).
- 442 20. Mayanja Y, Kamacooko O, Bagiire D, Namale G, Seeley J. Epidemiological  
443 Findings of Alcohol Misuse and Dependence Symptoms among Adolescent Girls and  
444 Young Women Involved in High-Risk Sexual Behavior in Kampala, Uganda.  
445 *International journal of environmental research and public health*. 2020;17(17):6129.  
446 <https://doi.org/10.3390/ijerph17176129>
- 447 21. Abbo C, Okello ES, Muhwezi W, Akello G, Ovuga E. Alcohol, substance use and  
448 psychosocial competence of adolescents in selected secondary schools in Uganda: A  
449 cross sectional survey. *International neuropsychiatric disease journal*. [2016;7\(2\):25387](https://doi.org/10.1186/1471-2458-12-1069).
- 450 22. Tumwesigye NM, Atuyambe L, Wanyenze RK, Kibira SP, Li Q, Wabwire-Mangen F,  
451 et al. Alcohol consumption and risky sexual behaviour in the fishing communities:  
452 evidence from two fish landing sites on Lake Victoria in Uganda. *BMC public health*.  
453 2012;12(1):1-11. [https://bmcpublichealth.biomedcentral.com/articles/10.1186/1471-](https://bmcpublichealth.biomedcentral.com/articles/10.1186/1471-2458-12-1069)  
454 [2458-12-1069](https://doi.org/10.1186/1471-2458-12-1069)
- 455 23. Uganda National Council for Science and Technology, National guidelines for  
456 research involving humans as research participants: Uganda National Council for  
457 Science and Technology Kampala-Uganda; 2014. [http://www.rec.ciu.ac.ug/human-](http://www.rec.ciu.ac.ug/human-subjects-protection-guidelines-july-2014)  
458 [subjects-protection-guidelines-july-2014](http://www.rec.ciu.ac.ug/human-subjects-protection-guidelines-july-2014).
- 459 24. World Health Organisation: The alcohol use disorders identification test: Guidelines  
460 for use in primary health care. World Health Organization; 2001.  
461 <https://www.mirecc.va.gov/>

- 462 25. Swahn M, Haberlen M, Palmier JB. Alcohol and drug use and other high-risk  
463 behaviors among youth in the slums of Kampala, Uganda: Perceptions and contexts  
464 obtained through focus groups. *International Journal of Alcohol and Drug Research*.  
465 2014;3(4):289-95. <https://doi.org/10.7895/ijadr.v3i4.171>
- 466 26. Ajayi AI, Somefun OD. Recreational drug use among Nigerian university students:  
467 Prevalence, correlates and frequency of use. *PLoS One*. 2020;15(5):e0232964.  
468 <https://doi.org/10.1371/journal.pone.0232964>
- 469 27. Kokkevi A, Richardson C, Florescu S, Kuzman M, Stergar E. Psychosocial  
470 correlates of substance use in adolescence: A cross-national study in six European  
471 countries. *Drug and alcohol dependence*. 2007;86(1):67-74  
472 <https://doi.org/10.1016/j.drugalcdep.2006.05.018>.
- 473 28. Thomas L, Vearey J, Mahlangu P. Making a difference to health in slums: an HIV  
474 and African perspective. *The Lancet*. 2011;377(9777):1571-2.  
475 [https://doi.org/10.1016/S0140-6736\(11\)60642-9](https://doi.org/10.1016/S0140-6736(11)60642-9)
- 476 29. Wado YD, Bangha M, Kabiru CW, Feyissa GT. Nature of, and responses to key  
477 sexual and reproductive health challenges for adolescents in urban slums in sub-  
478 Saharan Africa: a scoping review. *Reproductive Health*. 2020;17(1):1-14.  
479 [10.1186/s12978-020-00998-5](https://doi.org/10.1186/s12978-020-00998-5)
- 480 30. Hogarth L, Martin L, Seedat S. Relationship between childhood abuse and  
481 substance misuse problems is mediated by substance use coping motives, in school  
482 attending South African adolescents. *Drug and alcohol dependence*. 2019;194:69-74.  
483 <https://doi.org/10.1016/j.drugalcdep.2018.10.009>



- 484 31. Anastasi E, Ekanem E, Hill O, Adebayo Oluwakemi A, Abayomi O, Bernasconi A.  
485 Unmasking inequalities: Sub-national maternal and child mortality data from two urban  
486 slums in Lagos, Nigeria tells the story. PLoS One. 2017;12(5):e0177190.  
487 <https://doi.org/10.1371/journal.pone.0177190>
- 488 32. Speizer IS, Fotso JC, Davis JT, Saad A, Otai J. Timing and circumstances of first  
489 sex among female and male youth from select urban areas of Nigeria, Kenya, and  
490 Senegal. Journal of Adolescent Health. 2013;53(5):609-16.  
491 <https://doi.org/10.1016/j.jadohealth.2013.06.004>
- 492 33. Mbonye M, Rutakumwa R, Weiss H, Seeley J. Alcohol consumption and high risk  
493 sexual behaviour among female sex workers in Uganda. African Journal of AIDS  
494 Research. 2014;13(2):145-51. <https://doi.org/10.2989/16085906.2014.927779>
- 495 34. Schulkind J, Mbonye M, Watts C, Seeley J. The social context of gender-based  
496 violence, alcohol use and HIV risk among women involved in high-risk sexual behaviour  
497 and their intimate partners in Kampala, Uganda. Culture, health & sexuality.  
498 2016;18(7):770-84. <https://doi.org/10.1080/13691058.2015.1124456>
- 499 35. Tyler KA, Handema R, Schmitz RM, Phiri F, Kuyper KS, Wood C. Multi-level risk  
500 and protective factors for substance use among Zambian street youth. Substance Use  
501 & Misuse. 2016;51(7):922-31. <https://doi.org/10.3109/10826084.2016.1156702>
- 502 36. Klostermann KC, Fals-Stewart W. Intimate partner violence and alcohol use:  
503 Exploring the role of drinking in partner violence and its implications for intervention.  
504 Aggression and violent behavior. 2006;11(6):587-97.  
505 <https://doi.org/10.1016/j.avb.2005.08.008>

- 506 37. Nydegger LA, DiFranceis W, Quinn K, Dickson-Gomez J. Gender norms and age-  
507 disparate sexual relationships as predictors of intimate partner violence, sexual  
508 violence, and risky sex among adolescent gang members. *Journal of urban health*.  
509 2017;94(2):266-75. <https://link.springer.com/article/10.1007/s11524-016-0068-3>
- 510 38. Chiyaka T, Mushati P, Hensen B, Chabata S, Hargreaves JR, Floyd S, et al.  
511 Reaching young women who sell sex: methods and results of social mapping to  
512 describe and identify young women for DREAMS impact evaluation in Zimbabwe. *PloS*  
513 *one*. 2018;13(3):e0194301. <https://doi.org/10.1371/journal.pone.0194301>
- 514 39. Vandepitte J, Weiss HA, Bukenya J, Nakubulwa S, Mayanja Y, Matovu G, et al.  
515 Alcohol use, Mycoplasma genitalium and other STIs associated with HIV incidence  
516 among women at high risk in Kampala, Uganda. *Journal of acquired immune deficiency*  
517 *syndromes (1999)*. 2013;62(1):119. [10.1097/QAI.0b013e3182777167](https://doi.org/10.1097/QAI.0b013e3182777167)
- 518 40. Greene MC, Kane J, Tol WA. Alcohol use and intimate partner violence among  
519 women and their partners in sub-Saharan Africa. *Global Mental Health*. 2017;4.  
520 <https://www.cambridge.org/>

## 521 **Supporting Information**

### 522 **S1 Fig. Percentages of illicit drugs used by adolescents.**

523

524

525
